# Supplementary material
Source: PubMed Central journal article supplement (PMC4924082)
Supplement: np6b00227_si_001.pdf [file np6b00227_si_001.pdf]

## Supporting Information

# Leoligin, the Major Lignan from Edelweiss (*Leontopodium nivale* subsp. *alpinum*), Promotes Cholesterol Efflux from THP-1 Macrophages

Limei Wang,<sup>†</sup> Angela Ladurner,<sup>†</sup> Simone Latkolik,<sup>†</sup> Stefan Schwaiger,<sup>‡</sup> Thomas Linder,<sup>§</sup> Jan Hošek,<sup>||</sup> Veronika Palme,<sup>†</sup> Nicole Schilcher,<sup>†</sup> Ondřej Polanský,<sup>∇</sup> Elke H. Heiss,<sup>†</sup> Herbert Stangl,<sup>⊥</sup> Marko D. Mihovilovic,<sup>§</sup> Hermann Stuppner,<sup>‡</sup> Verena M. Dirsch,<sup>†</sup> Atanas G. Atanasov<sup>†, ○, \*</sup>

<sup>†</sup> Department of Pharmacognosy, University of Vienna, Vienna, Austria

<sup>‡</sup> Institute of Pharmacy/Pharmacognosy, Center for Molecular Biosciences, University of Innsbruck, Innsbruck, Austria

<sup>§</sup> Institute of Applied Synthetic Chemistry, Vienna University of Technology, Vienna, Austria

<sup>⊥</sup> Institute of Medical Chemistry, Center for Pathobiochemistry and Genetics, Medical University of Vienna, Vienna, Austria

<sup>||</sup> Department of Molecular Biology and Pharmaceutical Biotechnology, Faculty of Pharmacy, University of Veterinary and Pharmaceutical Sciences Brno, Brno, Czech Republic

<sup>∇</sup> Veterinary Research Institute, Brno, Czech Republic

<sup>○</sup> Institute of Genetics and Animal Breeding of the Polish Academy of Sciences, 05-552 Jastrzebiec, Poland

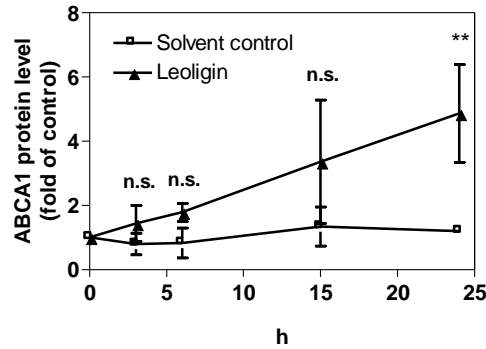

**Figure S1. Time-dependent effect of leoligin on ABCA1 protein expression.**

Differentiated THP-1 macrophages were incubated up to 24 h with (black triangles) or without (solvent vehicle control; white squares) leoligin at 10  $\mu$ M. Cells were lysed at different time points (0, 3, 6, 15, 24 h) and proteins were resolved on SDS-PAGE. Immuno-detection was performed with the ABCA1 antibody. The data are presented as mean  $\pm$  SD, and the statistical evaluation was performed by two-way ANOVA analysis with Bonferroni post test.  $**p < 0.01$  versus solvent control (DMSO); n.s. not significant versus DMSO. The 95% confidence interval (CI) of difference between the mean of DMSO and leoligin at different time points is -2.300 to 2.300, -1.661 to 2.940, -1.342 to 3.259, -0.2789 to 4.321 and 1.366 to 5.966.

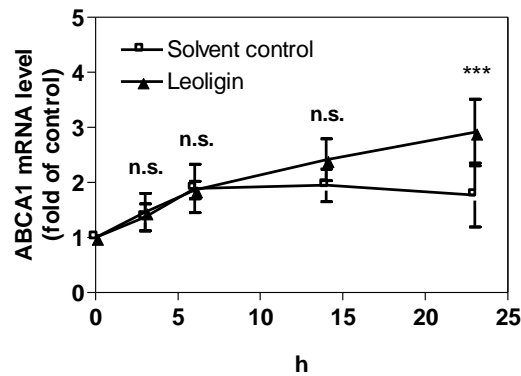

**Figure S2. Time-dependent effect of leoligin on ABCA1 mRNA level.**

Differentiated THP-1 macrophages were incubated with (black triangles) or without (solvent vehicle control; white squares) 10  $\mu$ M leoligin for up to 24 h. Total RNA was extracted and ABCA1 mRNA expression levels were quantified by qRT-PCR. The data are presented as mean  $\pm$  SD, and the statistical evaluation was performed by two-way ANOVA analysis with Bonferroni post test. \*\*\* $p < 0.001$  versus solvent control (DMSO); n.s. not significant versus DMSO. The 95% CI of difference between DMSO and leoligin at different time points is -0.6089 to 0.6089, -0.5196 to 0.6982, -0.6371 to 0.5807, -0.1451 to 1.073 and 0.5297 to 1.747.
